# Supplementary figures and images for: Exploring the Concept of In Vivo Guided Tissue Engineering by a Single-Stage Surgical Procedure in a Rodent Model
Source: MDPI journal article supplement (doi:10.3390/ijms232012703), 2022-10-21

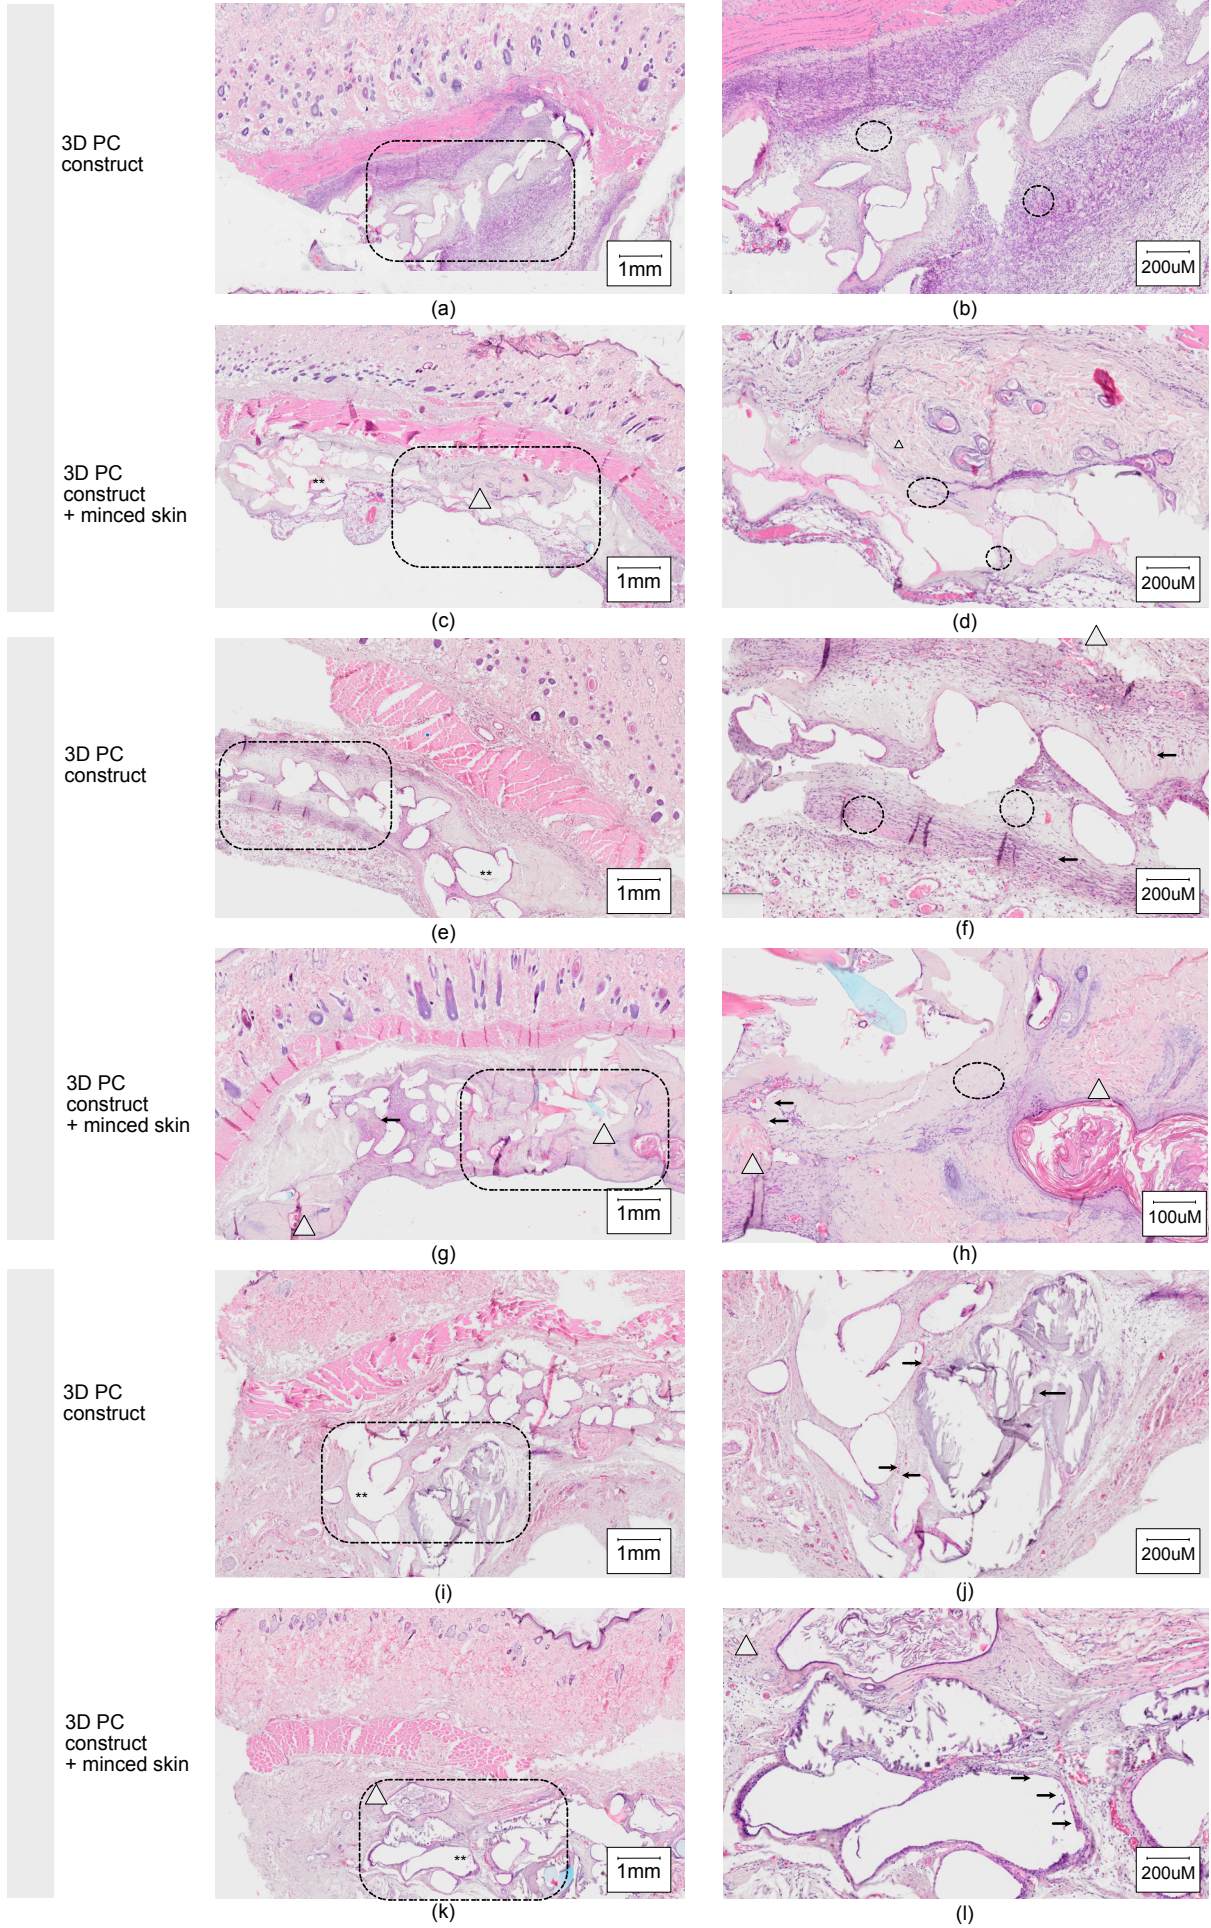

Supplement: s1 [file s1]

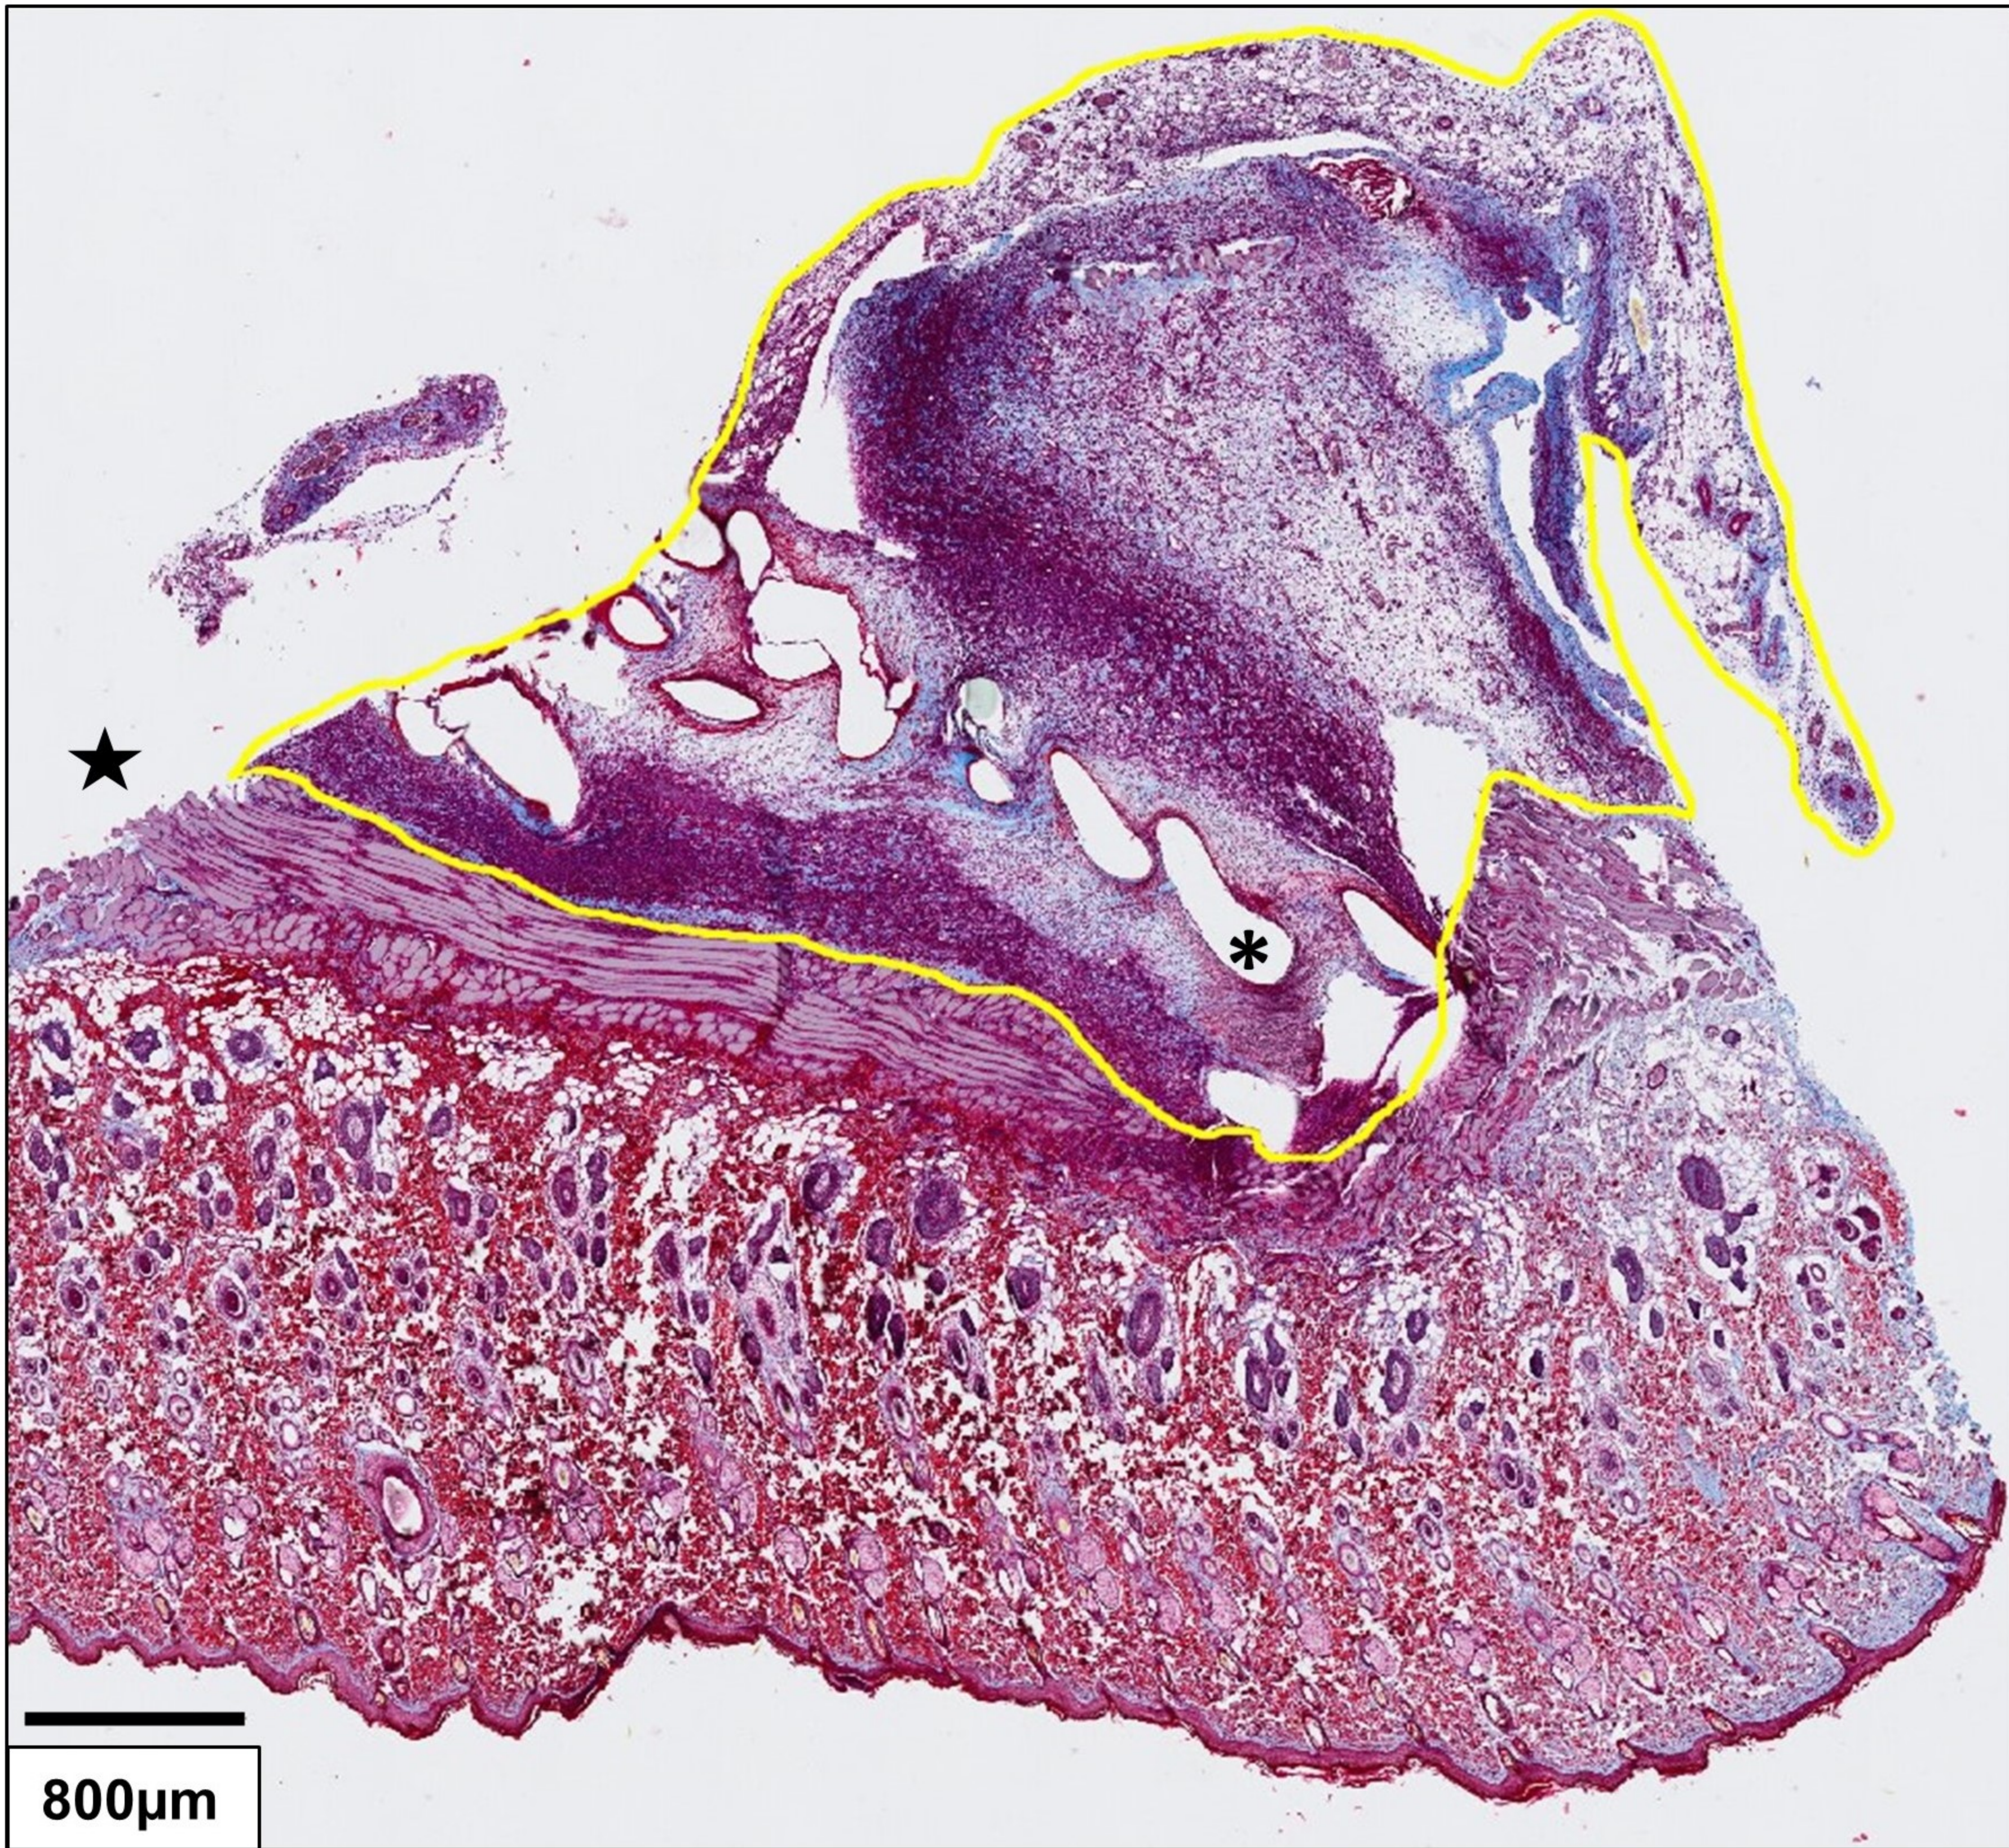

800μm

Supplement: s1 [file s1]
